# Supplementary material
Source: Springer Nature journal article supplement (https://www.springermedizin.de/resource/supplementary/13058_2012_3202_MOESM9_ESM.pdf/9703502)

MRI

Water (%)

ctHHb ( $\mu\text{M}$ )

TOI

Lipid (%)

Baseline

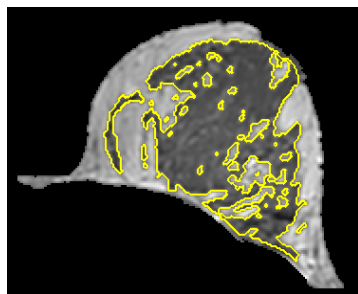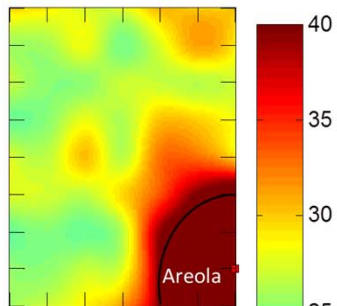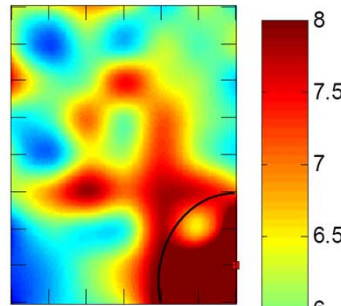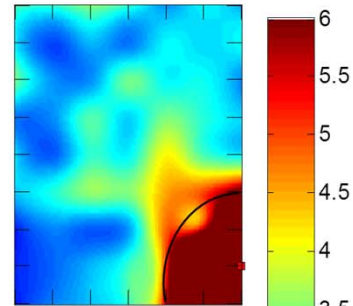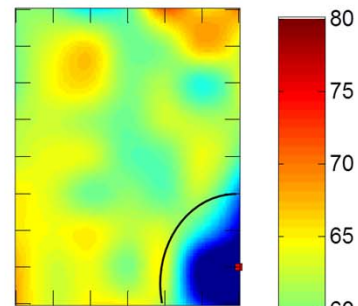End of  
chemotherapy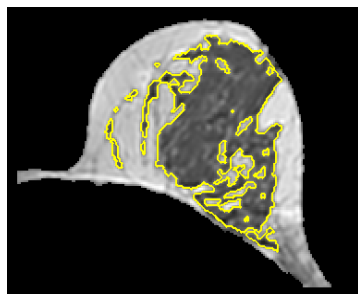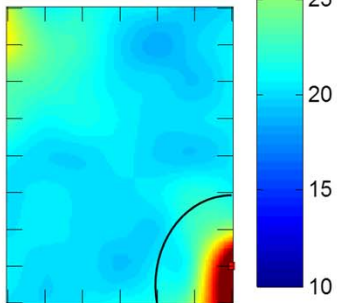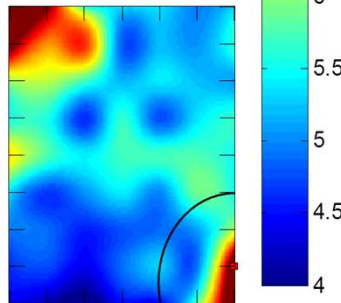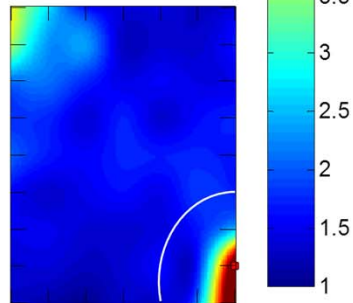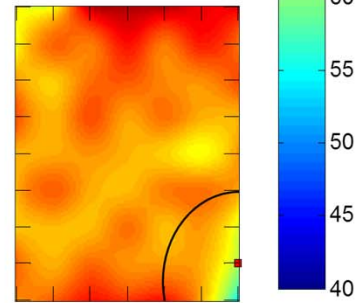

Supplement: MOESM9 [file 9703502]
